# Supplementary material
Source: HighWire-hosted journal article supplement (https://www.annfammed.org/highwire/filestream/9017/field_highwire_adjunct_files/0/Shires_Supp_App.pdf)
Supplement: Shires_Supp_App.pdf [file Shires_Supp_App.pdf]

Supplemental materials for:

Shires DA, Stroumsa D, Jaffee KD, Woodford MR. Primary care clinicians' willingness to care for transgender patients. *Ann Fam Med*. 2018;16(6):555-558.

Supplemental Appendix 1. Multivariable Logistic Regression: Factors Predicting Primary Care Clinicians' Willingness to *Provide Routine Care* to Transgender Patients (N=140)<sup>a</sup>

| Variable <sup>b</sup>                         | AOR  | 95% CI     | p    |
|-----------------------------------------------|------|------------|------|
| Age                                           | 0.96 | 0.91-0.99  | .039 |
| Continent of origin: North America/Caribbean  | 2.52 | 0.76-8.30  | .129 |
| Family medicine (vs. Internal medicine)       | 1.32 | 0.39-4.43  | .656 |
| Ever met transgender person                   | 1.60 | 0.40-6.34  | .505 |
| Cared for transgender patient in past 5 years | 2.25 | 0.57-8.88  | .247 |
| Empathy                                       | 1.31 | 0.91-1.86  | .143 |
| Transphobia                                   | 0.82 | 0.48-1.42  | .479 |
| Lack of training on transgender health        | 0.53 | 0.52-5.38  | .593 |
| Lack of exposure to transgender patients      | 0.63 | 0.11-3.64  | .606 |
| Lack of knowledge among staff                 | 0.41 | 0.08-2.19  | .299 |
| Lack of familiarity with guidelines           | 4.48 | 0.51-39.22 | .175 |

<sup>a</sup> $\chi^2(11, N=140) = 26.19, p=.006$ , Nagelkerke  $R^2 = .306$

<sup>b</sup> *Feels capable of providing routine care* was not included in the model due to a lack of variability and resulting instability

Supplemental Appendix 2. Multivariable Logistic Regression: Factors Predicting Primary Care Clinicians' Willingness to *Provide Pap Tests for Transgender Men* (N=140)<sup>a</sup>

| Variable                                      | AOR  | 95% CI     | p    |
|-----------------------------------------------|------|------------|------|
| Age                                           | 0.97 | 0.94-1.01  | .123 |
| Continent of origin: North America/Caribbean  | 1.04 | 0.35-3.09  | .945 |
| Family medicine (vs. Internal medicine)       | 5.08 | 1.35-19.16 | .016 |
| Ever met transgender person                   | 4.11 | 1.13-14.96 | .032 |
| Cared for transgender patient in past 5 years | 1.14 | 0.33-3.94  | .832 |
| Empathy                                       | 1.18 | 0.84-1.67  | .339 |
| Transphobia                                   | 0.54 | 0.32-0.91  | .020 |
| Lack of training on transgender health        | 1.05 | 0.16-3.78  | .964 |
| Lack of exposure to transgender patients      | 0.77 | 0.16-3.78  | .746 |
| Lack of knowledge among staff                 | 0.88 | 0.19-4.09  | .872 |
| Lack of familiarity with guidelines           | 0.59 | 0.09-3.87  | .585 |
| Feels capable of providing routine care       | 2.11 | 0.72-6.19  | .172 |

<sup>a</sup> $\chi^2(12, N=140) = 38.83, p<.001$ , Nagelkerke  $R^2 = .376$
